# Supplementary material
Source: MDPI journal article supplement (https://www.mdpi.com/2072-4292/11/6/644)
Supplement: s1 [file s1]

# **Supplementary Materials: Intercomparison of surface albedo retrievals from MISR, MODIS, CGLS using tower and upscaled tower measurements. *Remote Sensing* 2019, 3, remotesensing-449987**

**Rui Song <sup>1,\*</sup>, Jan-Peter Muller <sup>1</sup> and Said Kharbouche <sup>1</sup> and William Woodgate <sup>2</sup>**

<sup>1</sup> Imaging Group, Mullard Space Science Laboratory, University College London, Holmbury St Mary, Dorking, Surrey RH56NT, UK; j.muller@ucl.ac.uk (J.-P.M.); s.kharbouche@ucl.ac.uk (S.K.)

<sup>2</sup> Building 801, CSIRO, Black Mountain, Canberra 2601, Australia; William.Woodgate@csiro.au

\* Correspondence: rui.song@ucl.ac.uk

Received: 3 February 2019; Accepted: 11 March 2019; Published: date

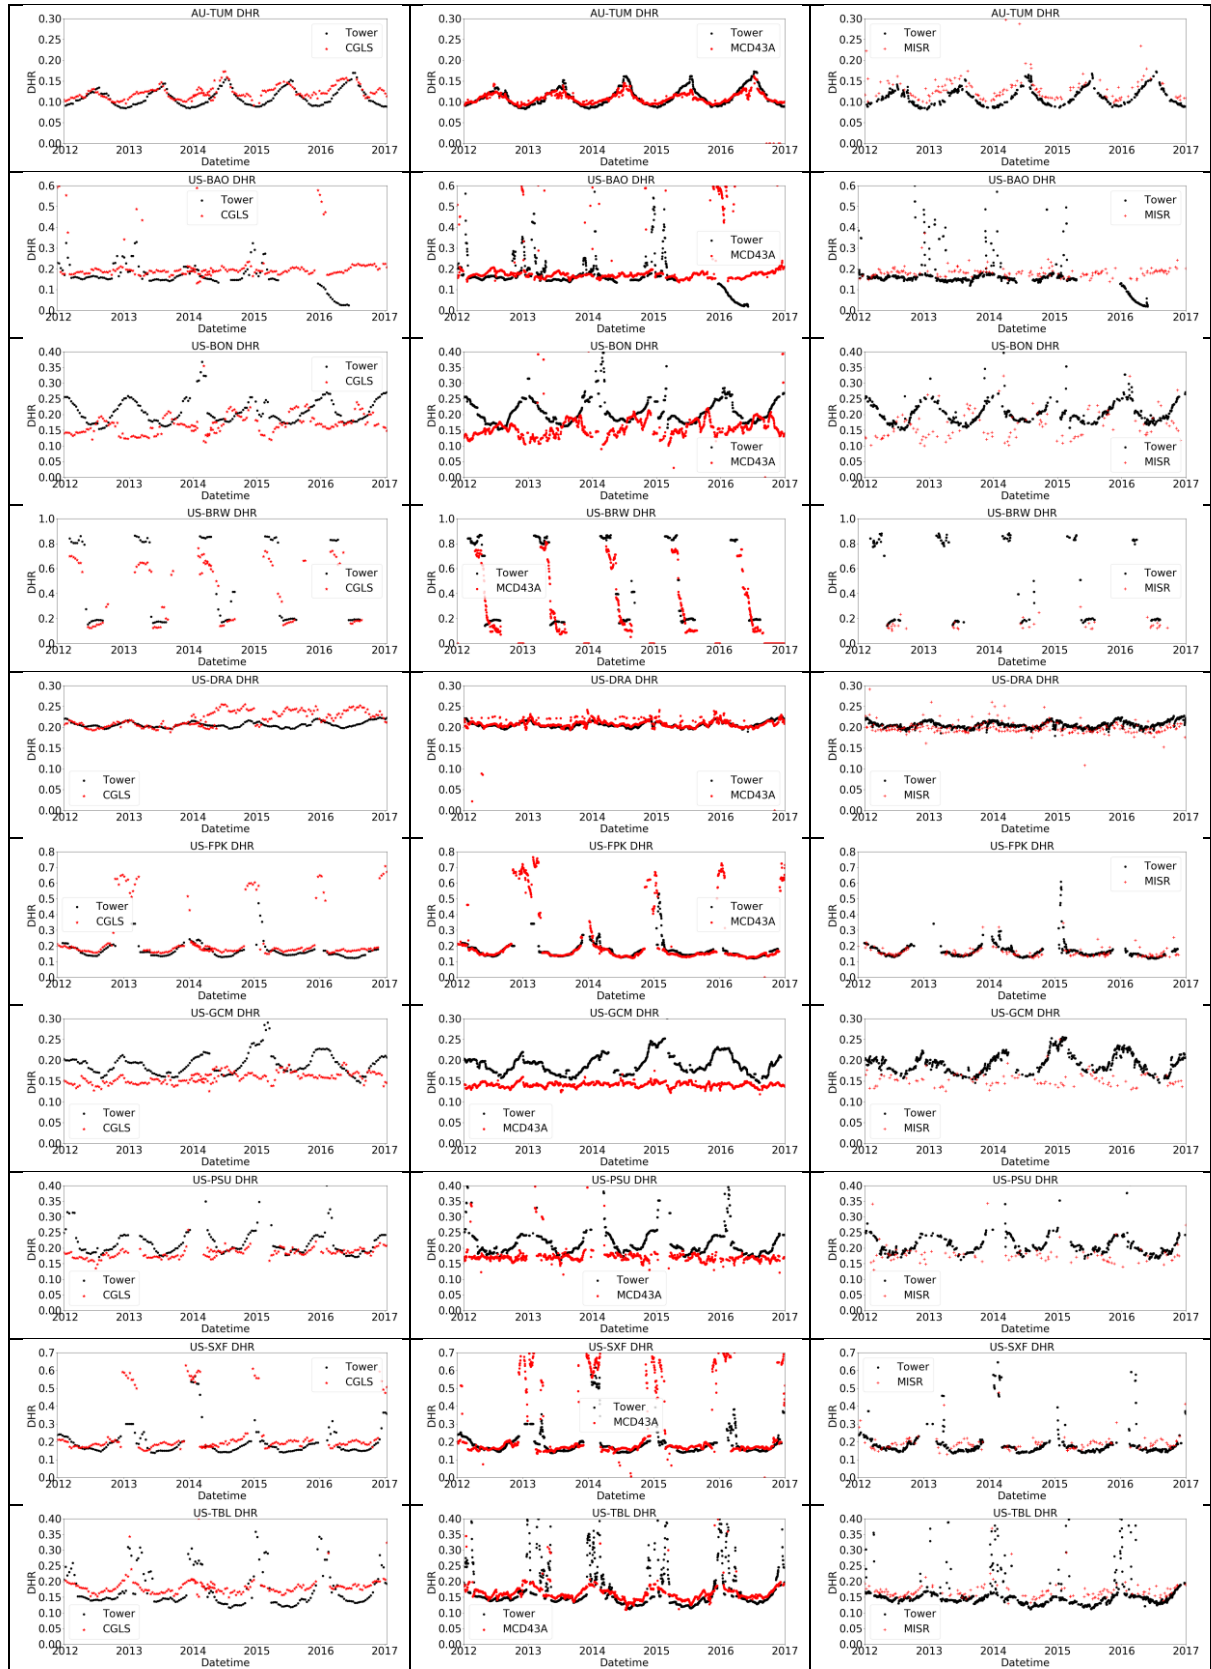

**Figure S1.** CGLS (column 1), MODIS (column 2) and MISR (column 3) DHR products compared with tower derived DHRs.

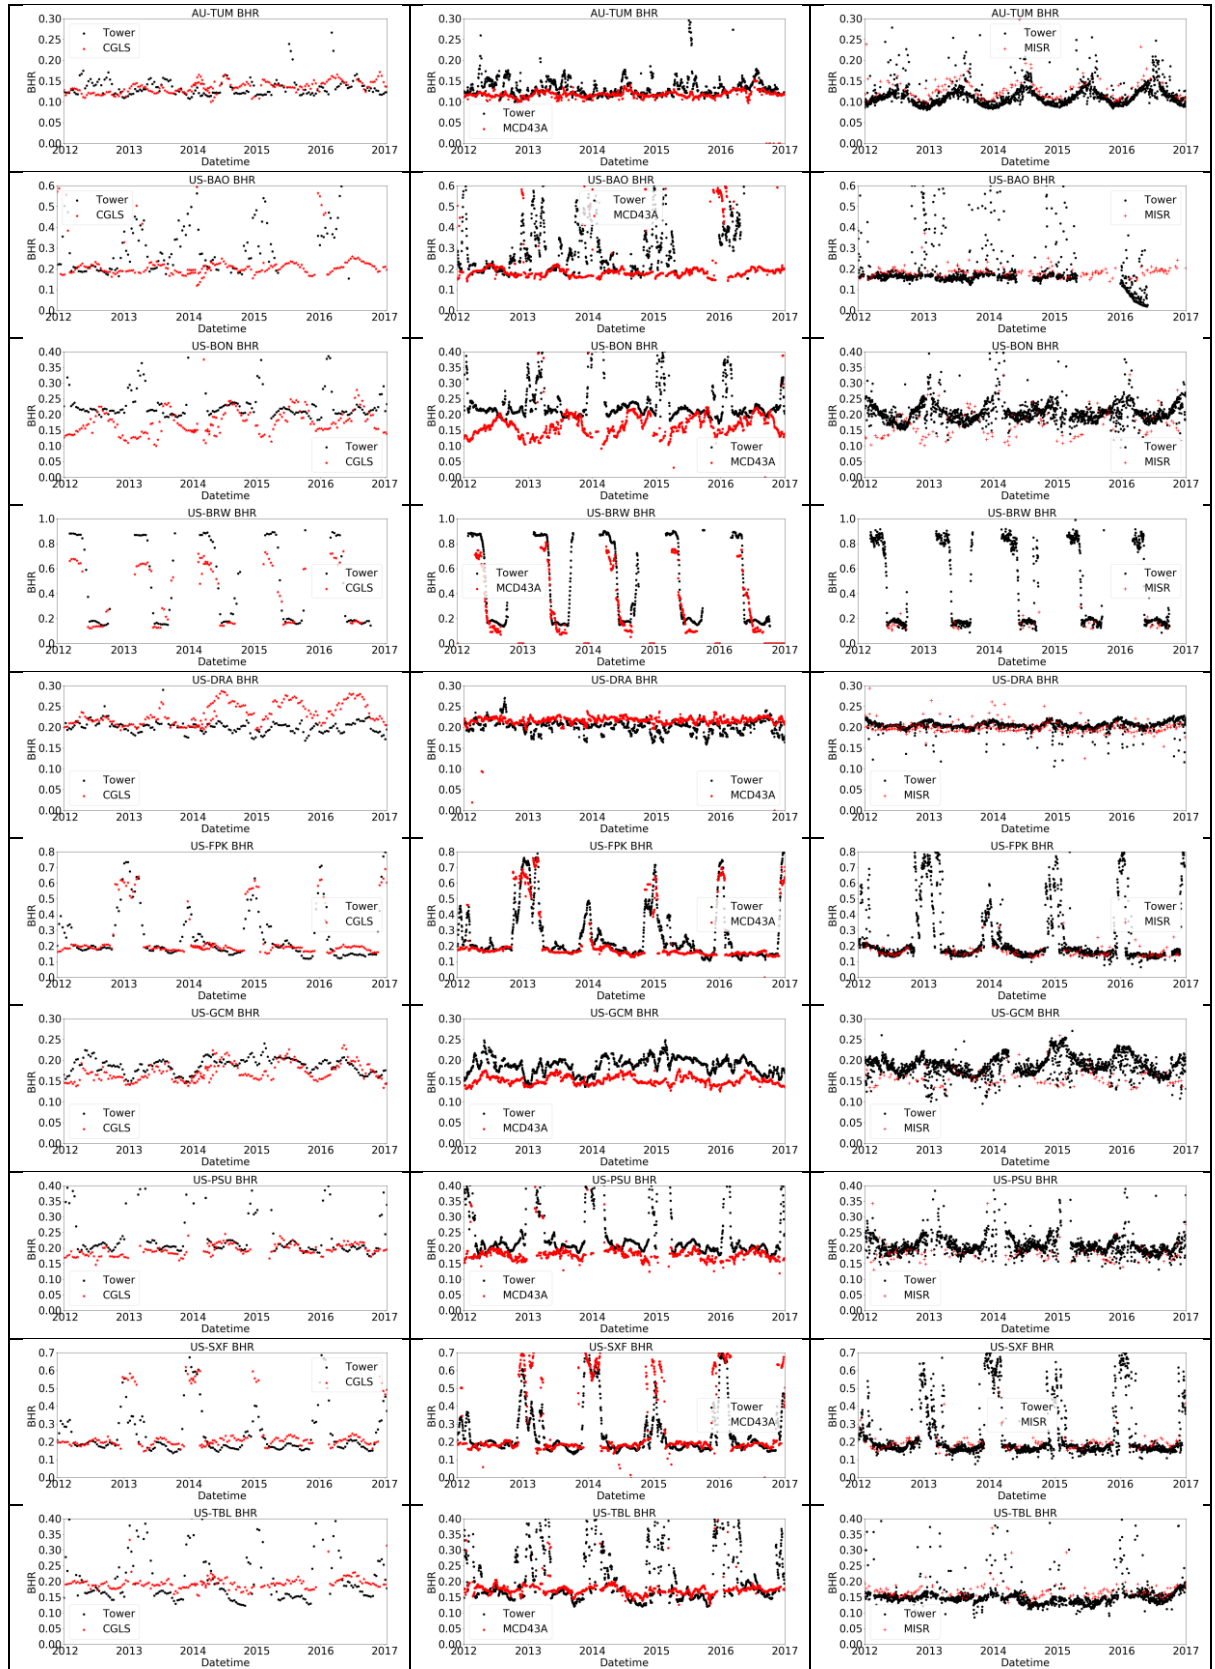

Figure S2. CGLS (column 1), MODIS (column 2) and MISR (column 3) BHR compared with tower derived BHRs.

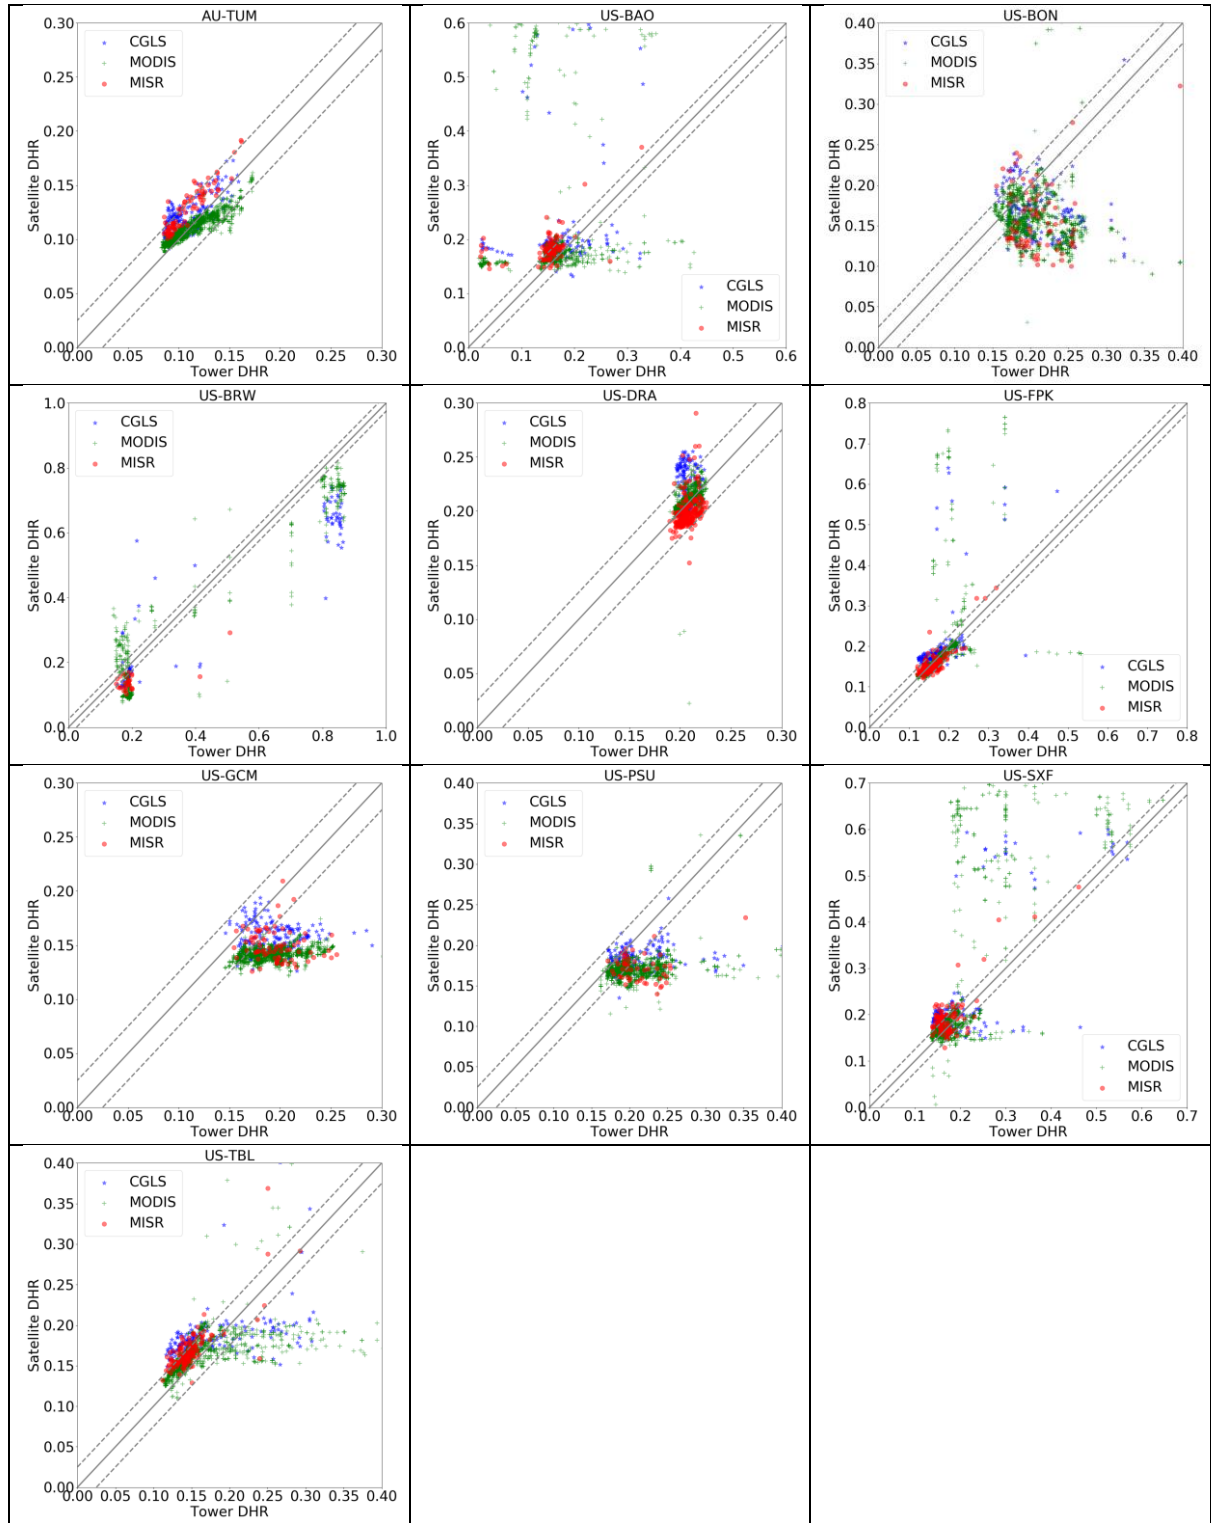

**Figure S3.** Scatter plot of DHR values retrieved from CGLS, MODIS and MISR between 2012 and 2016.

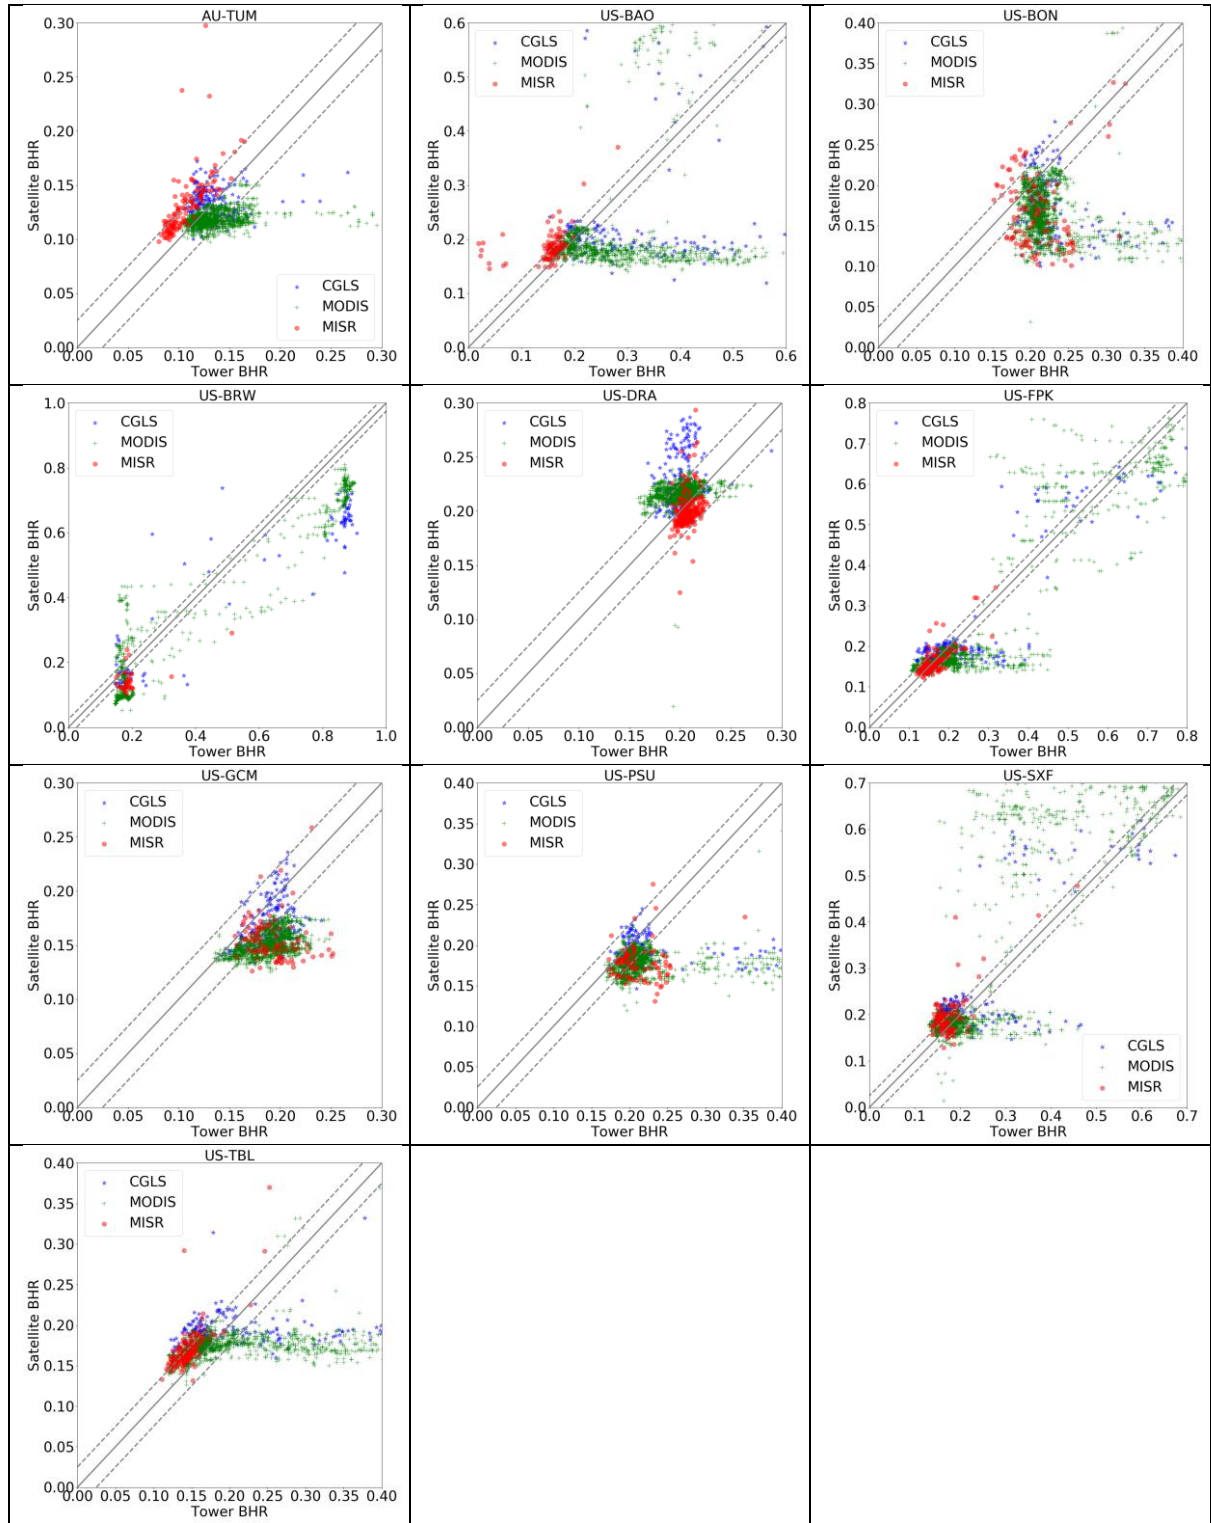

**Figure S4.** Scatter plot of BHR values retrieved from CGLS, MODIS and MISR between 2012 and 2016.

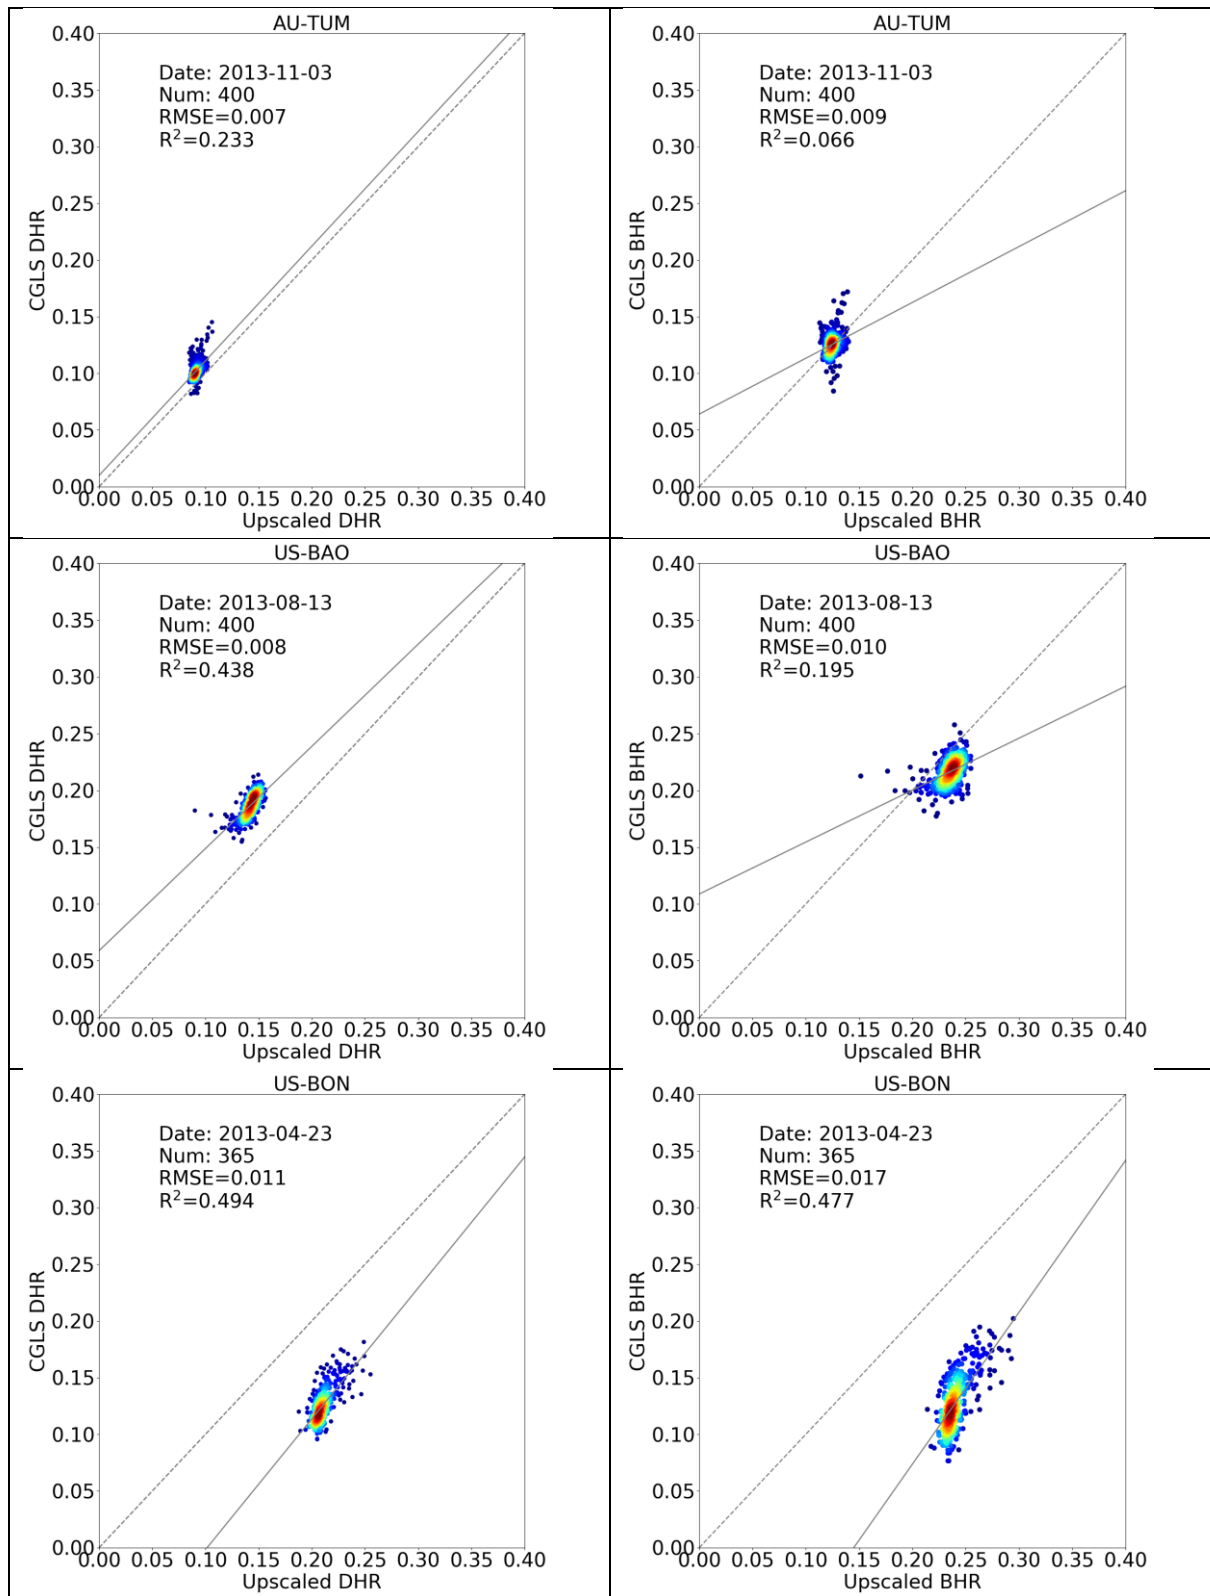

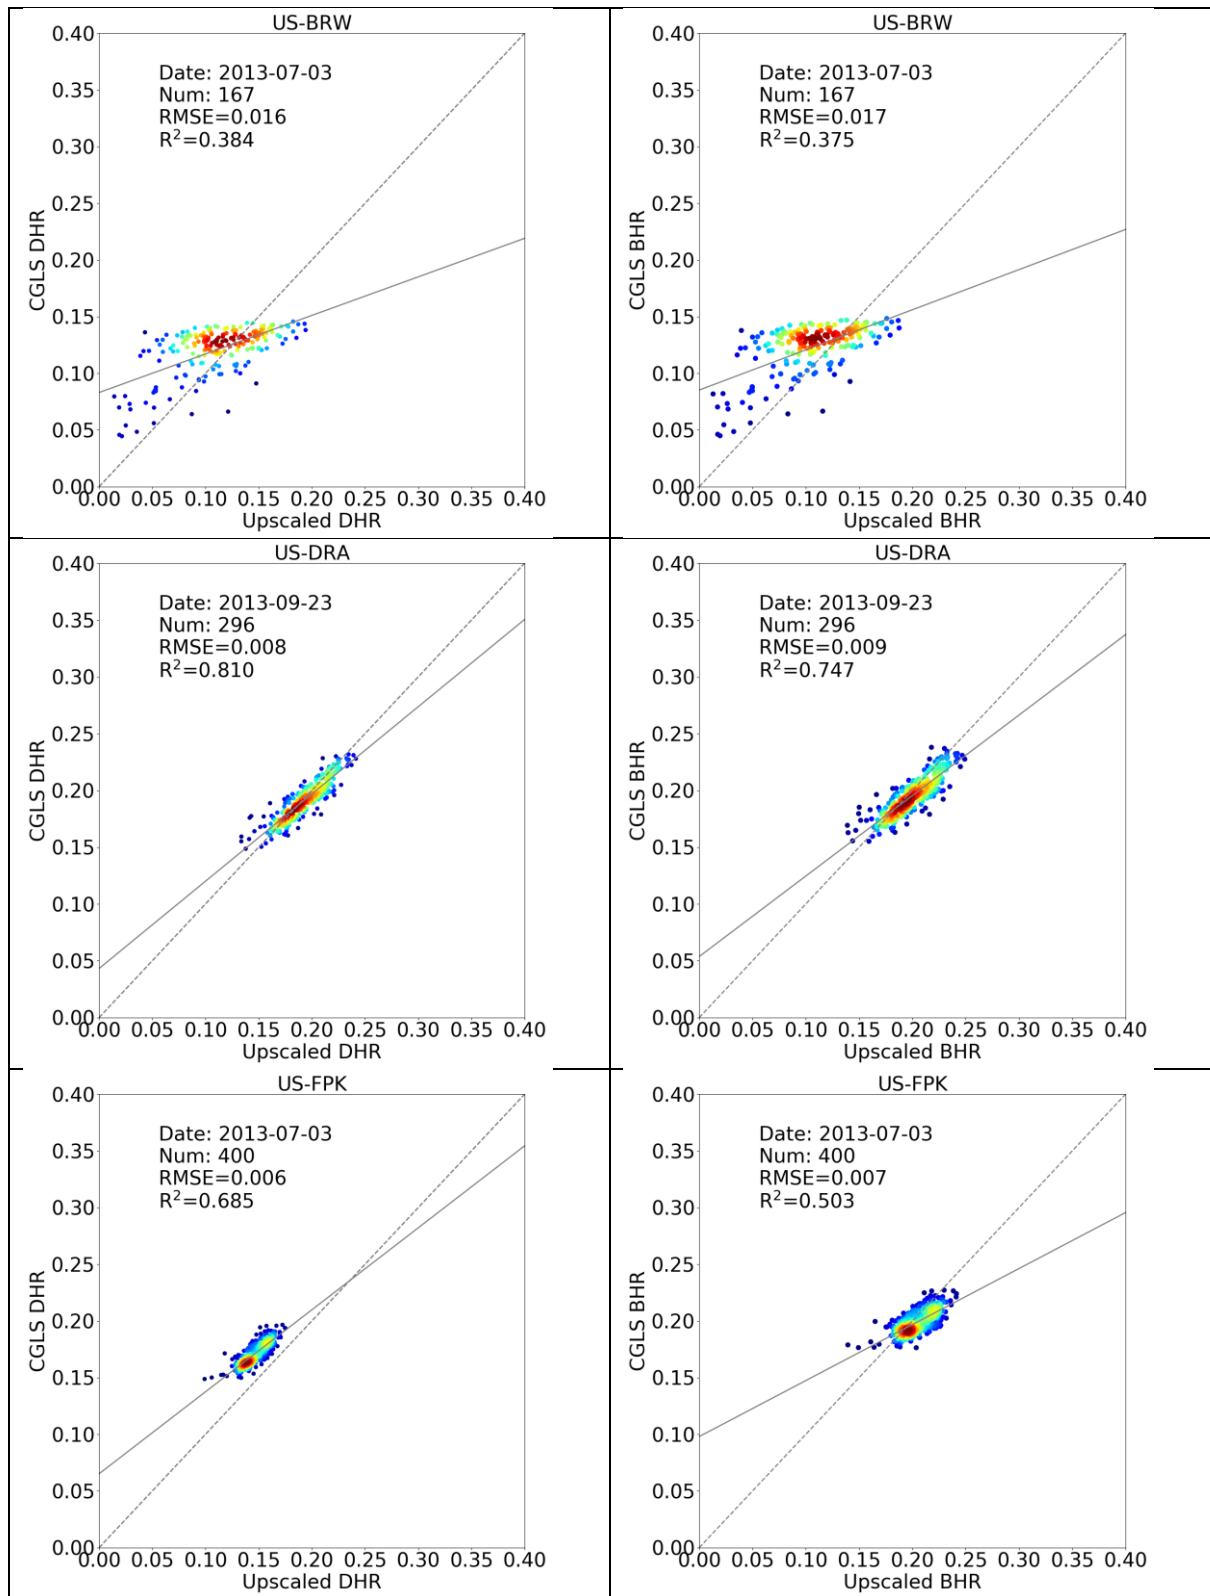



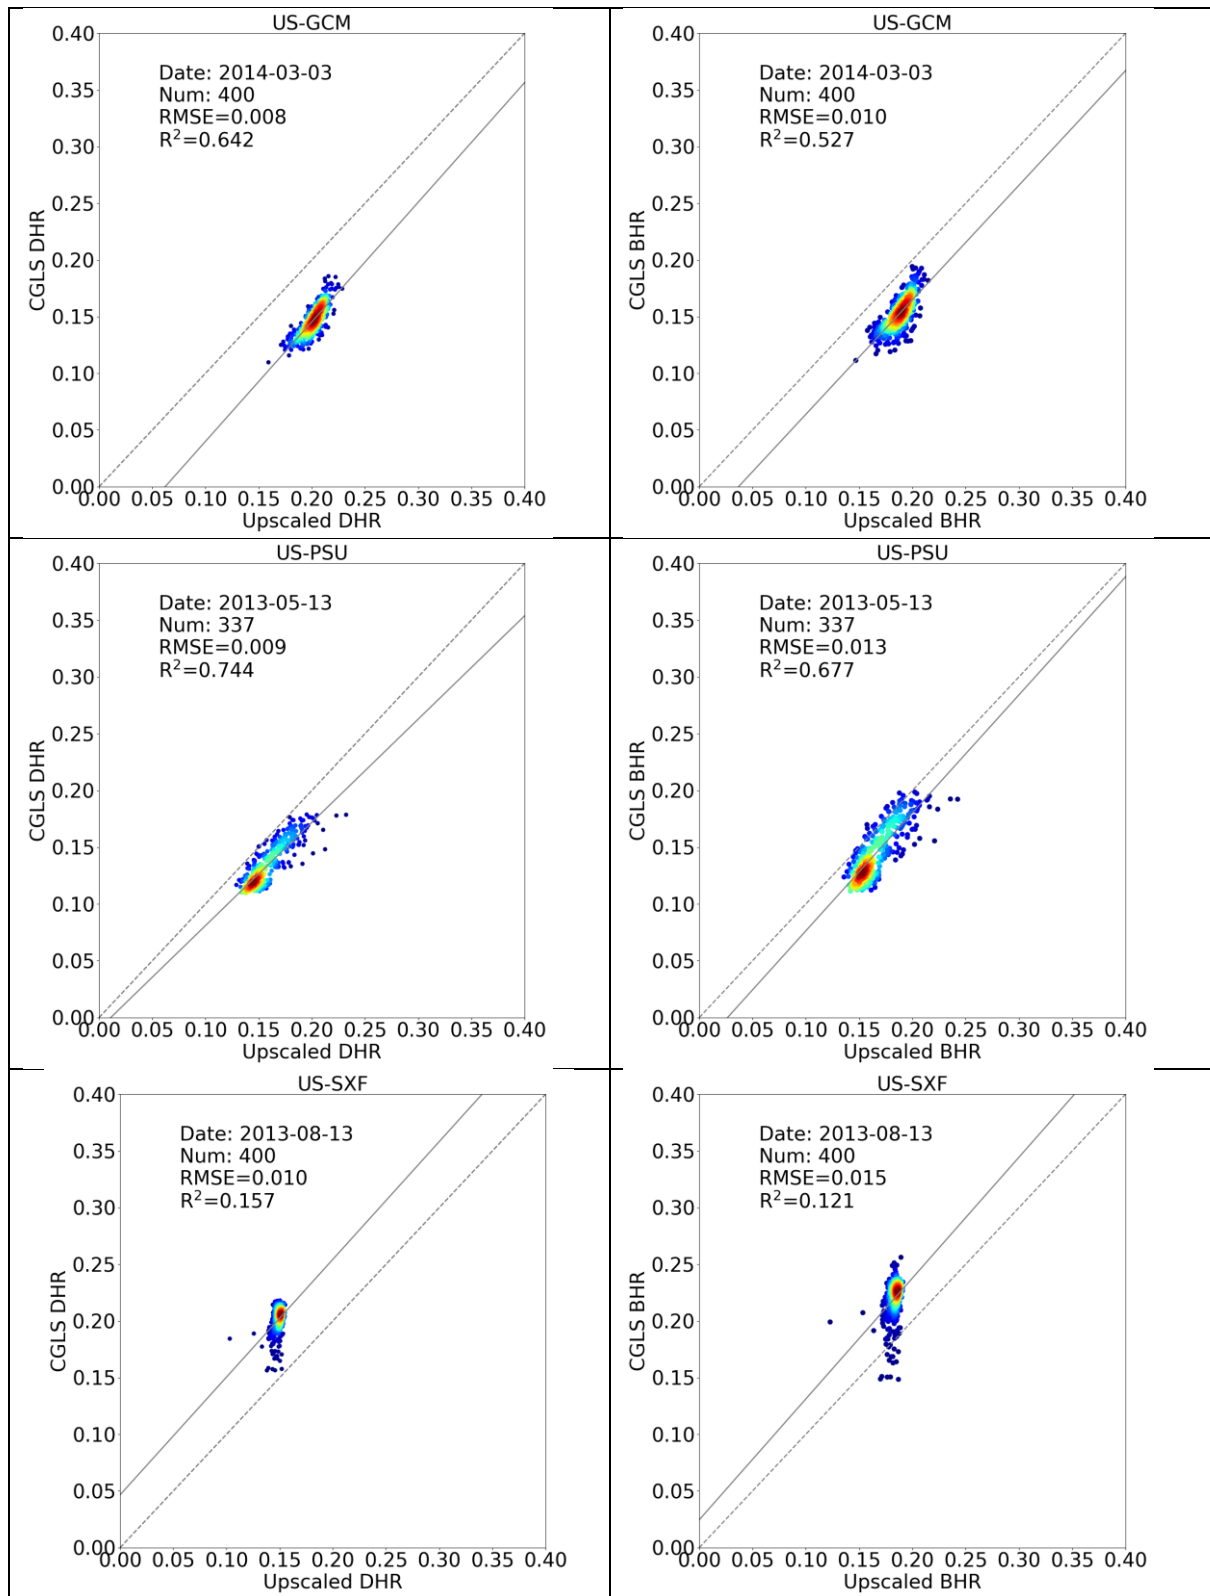



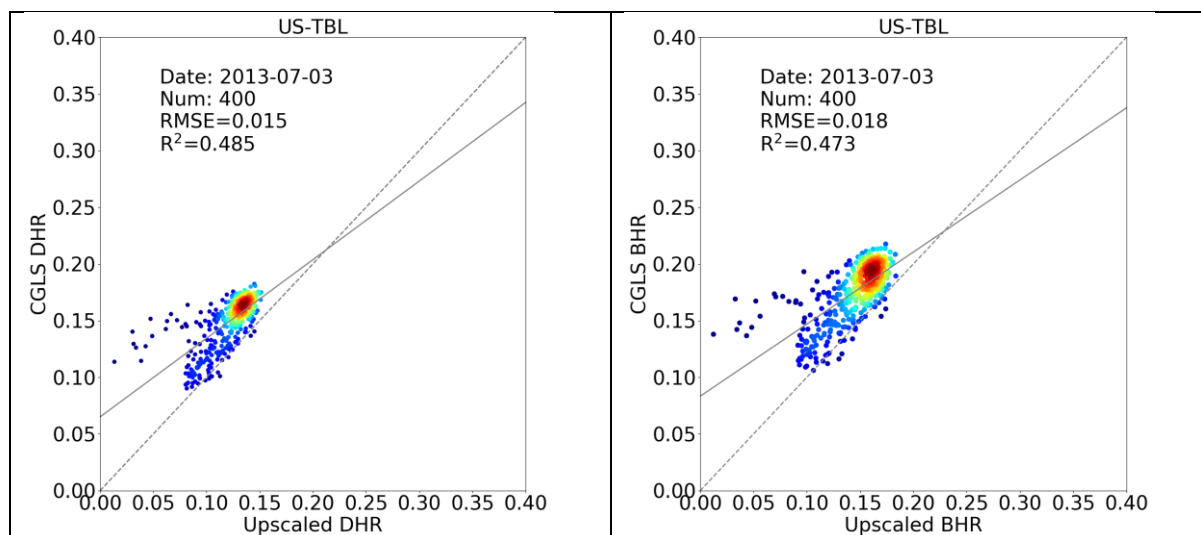

**Figure S5.** Density plot of DHR and BHR upscaled from tower FoV to CGLS resolution over a 20\*20 pixel region.
